# Supplementary material
Source: HighWire-hosted journal article supplement (http://ajnr-stage2.highwire.org/highwire/filestream/76231/field_highwire_adjunct_files/0/19-01253.pdf)
Supplement: 19-01253.pdf [file 19-01253.pdf]

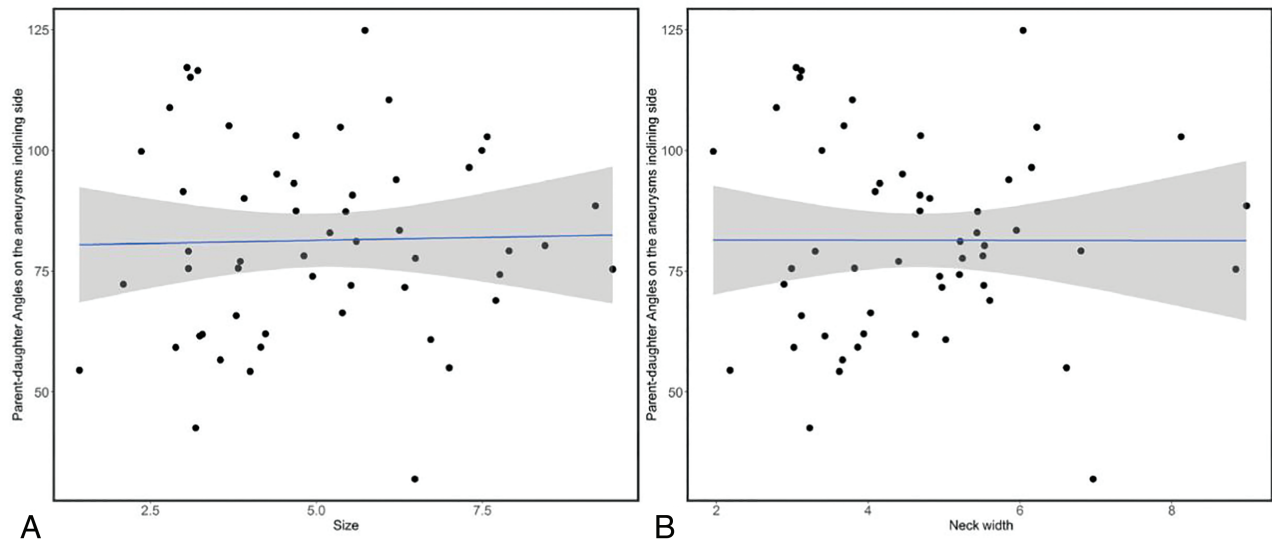

**ON-LINE FIGURE.** Correlation between the parent-daughter angles on the inclining side of the aneurysms and aneurysm size ( $P = .991$ , A) and neck width ( $P = .871$ , B).
